# Supplementary material
Source: PubMed Central journal article supplement (PMC4588275)
Supplement: JCI80437sd.pdf [file JCI80437sd.pdf]

## Supplementary figures

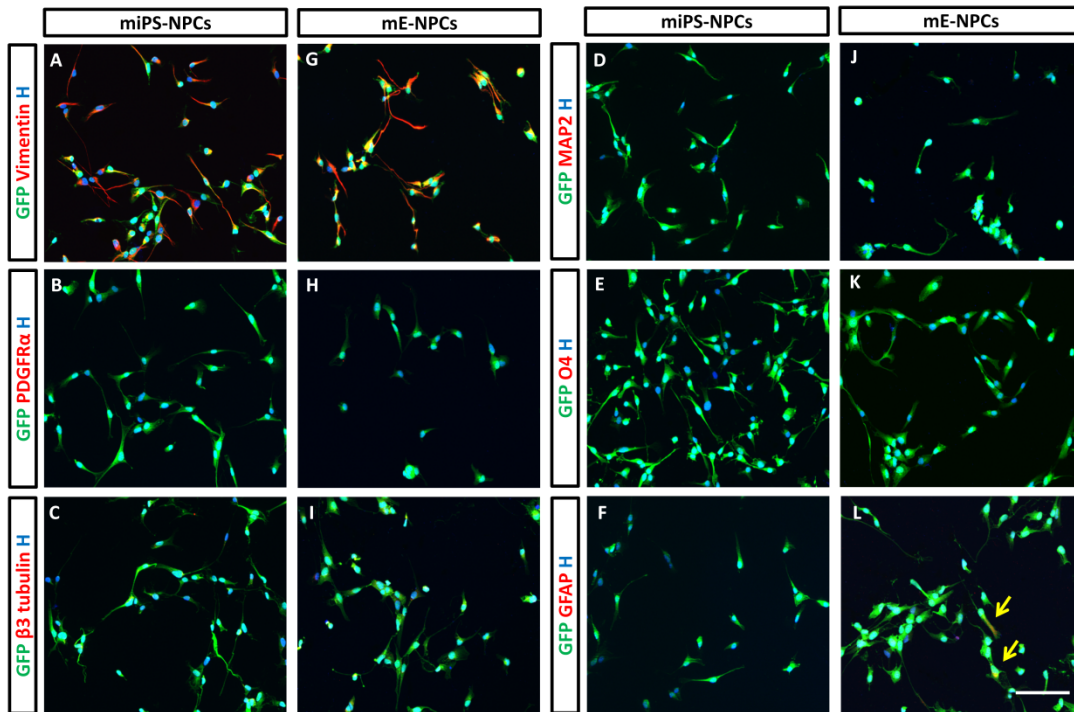

**Figure S1. miPS-NPCs do not express mature markers of neural cells in vitro.**

Immunocytochemical characterization of miPSC-NPCs (A-F) and mE-NPCs (G-L). Both NPC sources expressed (A, G) vimentin but not (B, H) PDGFR $\alpha$ , marker of oligodendrocyte precursor cells. (C, J) Few cells expressed  $\beta$ 3 tubulin, and (D, J) none the neuronal marker MAP2 or (E, K) oligodendrocyte marker O4. (F, L) Few mE-NPCs (arrows) but not miPS-NPCs expressed the astrocyte marker GFAP. A-L were performed in three independent experiments. H: Hoechst dye; Scale bar: 100 $\mu$ m.

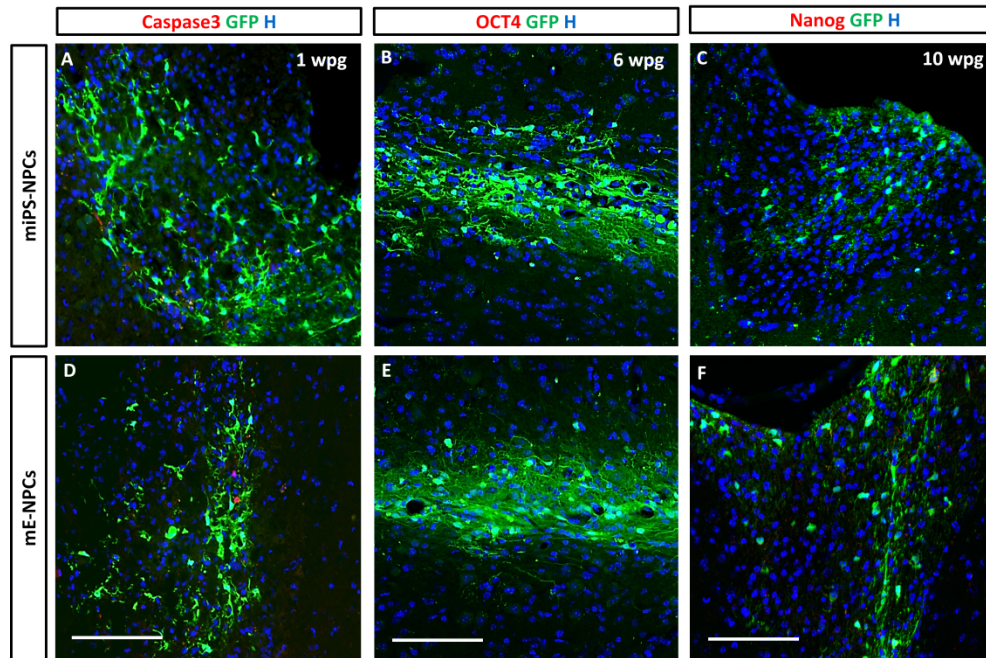

**Figure S2. Analysis of survival, pluripotency and tumorigenesis of the grafted cells.**

(A) Immunostaining of coronal sections of dorsal funiculus 1wpg for the apoptotic marker Caspase 3: miPS-NPCs did not undergo apoptosis in vivo. (B) Longitudinal sections of the spinal cord stained for OCT4: miPS-derived cells did not re-express this pluripotency marker 6wpg. (C) Staining of coronal sections for the tumorigenic cell marker Nanog: no sign of uncontrolled growth as far as 10wpg. (D-F) Expression of these markers in tissues grafted with mE-NPCs. n = 3 mice per each group/staining. H: Hoechst dye; wpg: week(s) post graft; Scale bars: 100 $\mu$ m.

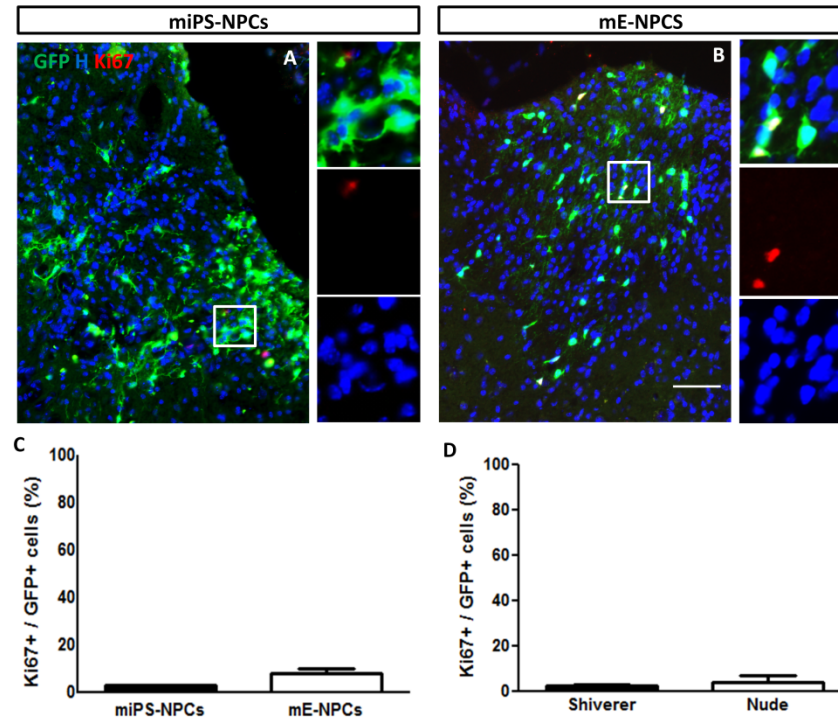

**Figure S3. miPS-NPCs down-regulate their proliferation in vivo.**

(A, B) Coronal sections of dorsal funiculus of transplanted *Shi/Shi:Rag2<sup>-/-</sup>* mice stained with the proliferation marker Ki67. (C) Up to 98% of GFP+ miPS-NPCs derived cells were negative for this marker at 6wpg. Although not significantly different from miPS derived cells, mE-NPC derived cells remained more proliferative at this time point (8% of GFP+ cells). (D) No significant difference in Ki67 expression was observed in miPS-NPCs grafted *Shi/Shi:Rag2<sup>-/-</sup>* mice compared to nude mice. Mann Whitney test was used for the statistical analysis of these experiments (n = 3-4 mice per each group). H: Hoechst dye; Scale bar: 50μm.

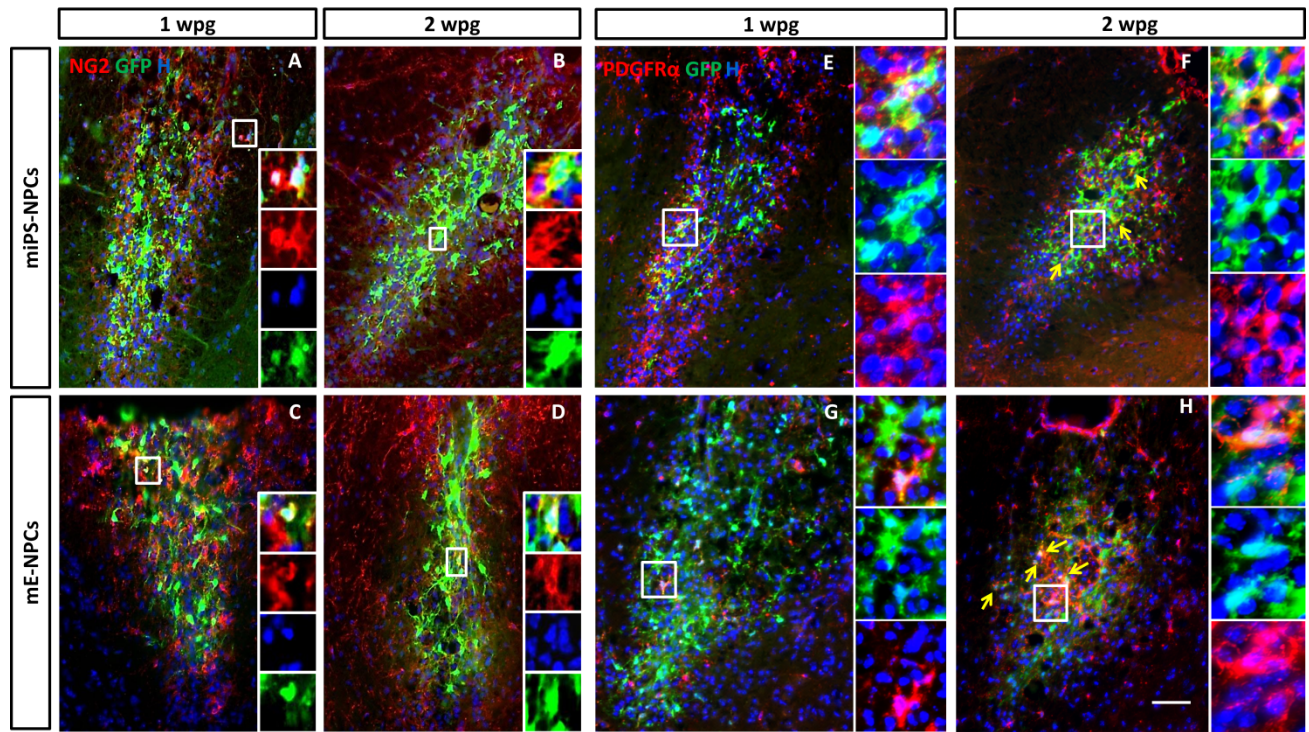

**Figure S4. miPS-NPCs expressed oligodendroglial markers as soon as exposed to demyelinated axons in adult nude mice.**

(A-H) miPS-NPCs (A, B, E and F) and mE-NPCs (C, D, G and H) expressed OPC markers as of 1wpg in demyelinating condition: (A-D) NG2. (E-H) PDGFR $\alpha$ . n = 3-4 mice per each group. H: Hoechst dye; wpg: week(s) post graft; Scale bar: 50 $\mu$ m.

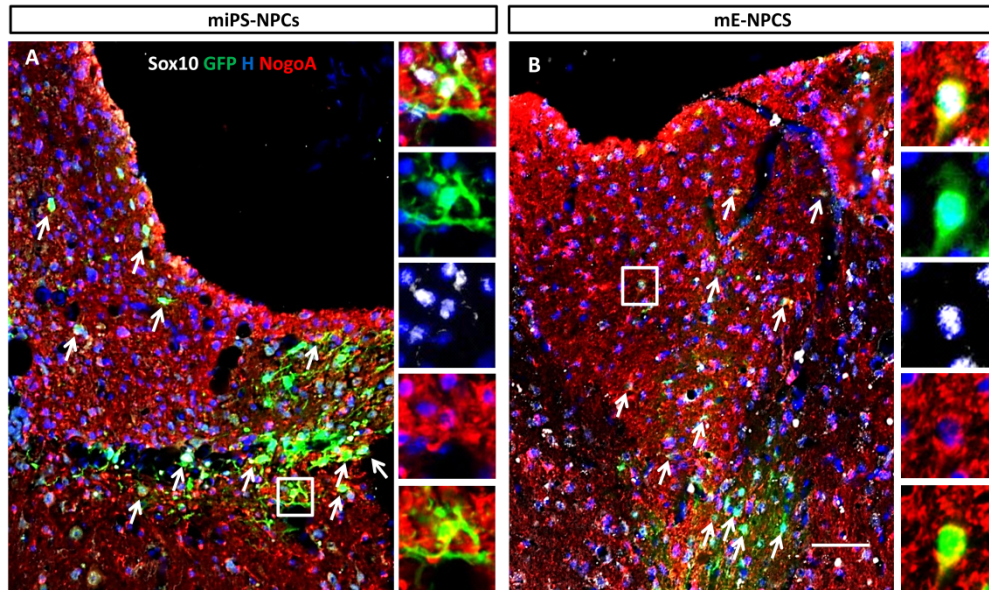

**Figure S5. The majority of miPS-derived cells show oligodendroglial fate after transplantation in adult demyelinating conditions.**

(A, B) Coronal sections of dorsal funiculus of demyelinated *Shi/Shi:Rag2<sup>-/-</sup>* mice at 6wpg with (A) miPS-NPCs and (B) mE-NPCs show that numerous GFP+ cells were Sox10+ (white) and NogoA+ (red) mature oligodendrocytes. n = 3 mice per each group. H: Hoechst dye; Scale bar: 50μm.

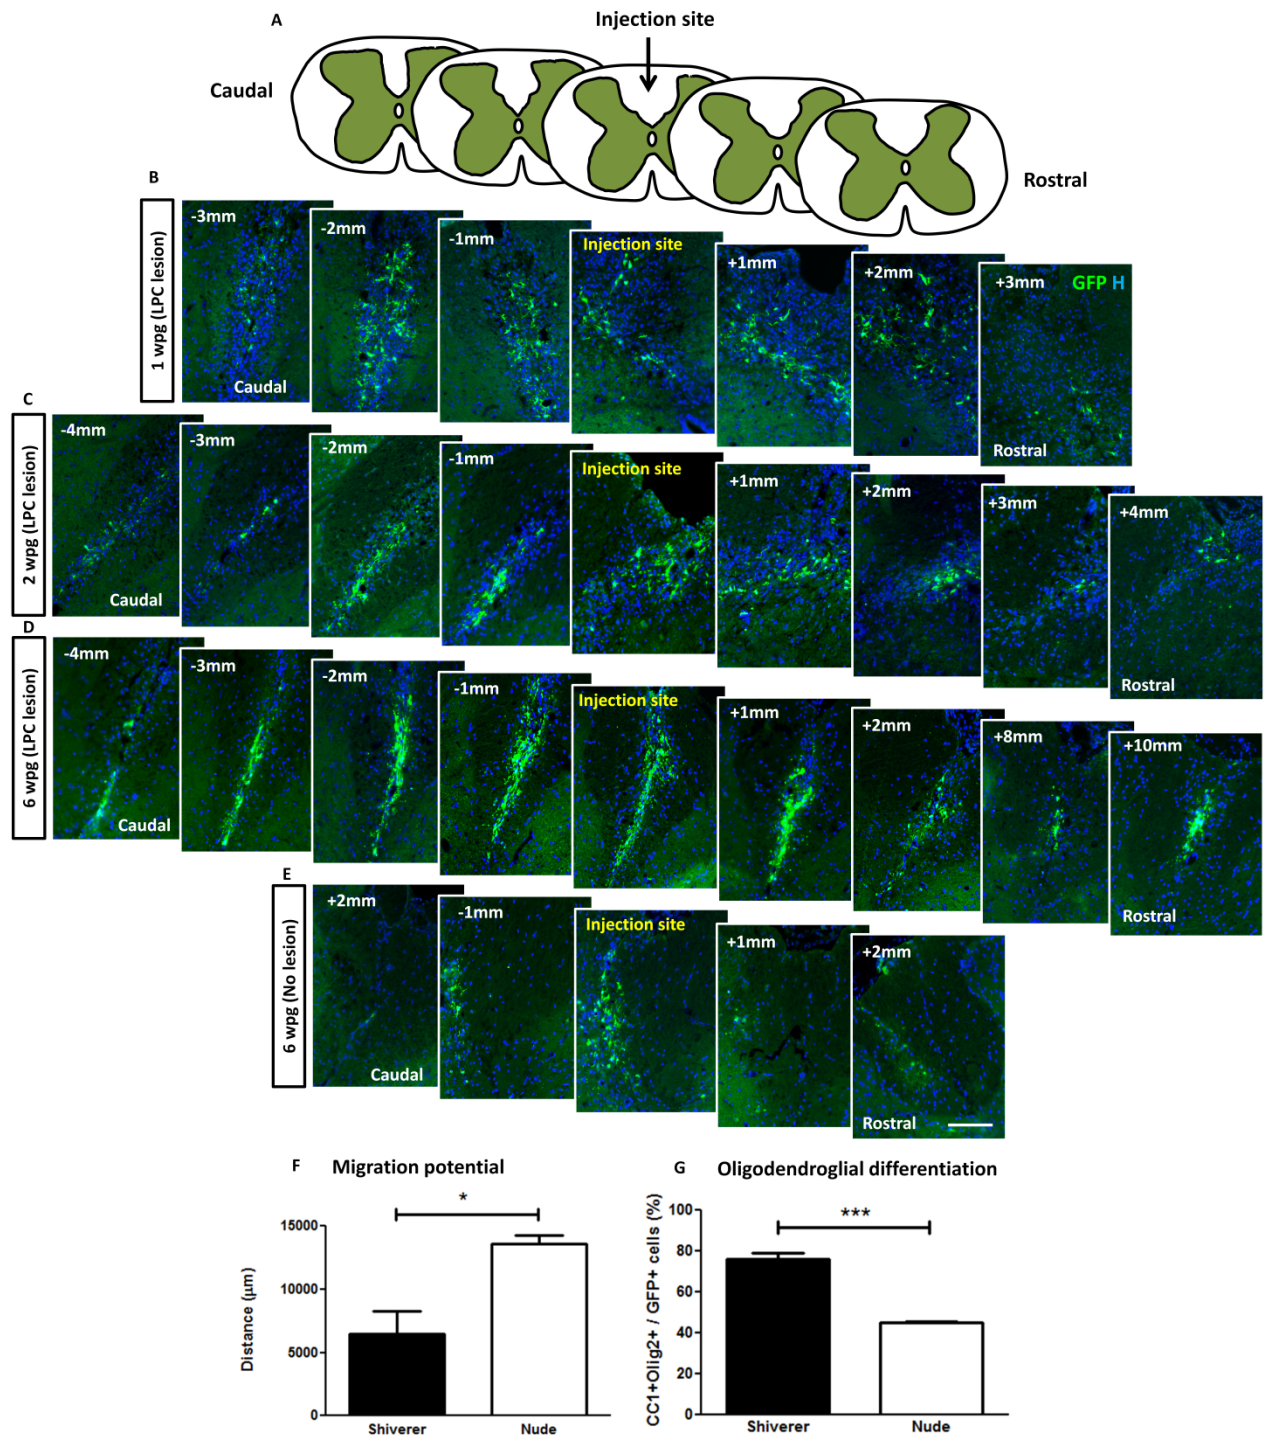

**Figure S6. miPS-NPCs migrate more and differentiate less in nude compared to *Shi/Shi;Rag2<sup>-/-</sup>* mice.**

(A) Schematic representation of serial coronal sections of the adult spinal cord. Total 12  $\mu$ m coronal sections (including the injection site) were collected from each animal and the distance between the most rostral and caudal sections containing GFP<sup>+</sup> cells was calculated. (B-D) Migration of miPS-derived cells in nude mice at 1, 2, 6wpg respectively. Cells migrated as a function of time (See Figure 5D). (E) In the absence of lesion, miPS-NPCs remained closer to the injection site. (F, G) miPS-NPCs migrated less (F) but differentiate more into mature oligodendrocytes (G) in *Shi/Shi:Rag2*<sup>-/-</sup> compared to nude mice (See Figure 4A and Figure 3Aiii). Student's t-test was used for the statistical analysis (n = 3-4 mice per each group). \* P < 0.05, \*\*\* P < 0.001. H: Hoechst dye; wpg: week(s) post graft; Scal bar: 100 $\mu$ m.

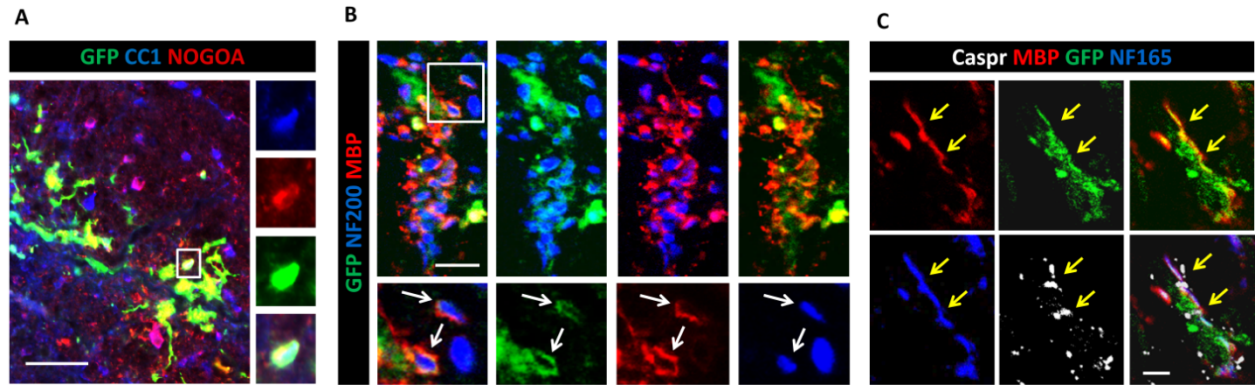

**Figure S7. miPS-NPCs produce functional myelin in demyelinated myelin-wild type nude mice.**

(A) CC1+ mature oligodendrocyte derived from miPS-NPCs also expressed NogoA 6wp. (B) Further immunolabelling on coronal sections from demyelinated nude mice revealed that processes of GFP+ oligodendrocytes wrap around host axons (blue) while expressing MBP+ (red). (C) a longitudinal view shows integration of graft-driven myelin (GFP+MBP+) into paranodal structure (Caspr+, white) of a host axon (NF165+, blue). n= 3-4 mice per each staining. Scale bars: 50µm in A and 5µm in B and C.
